# Supplementary material for: Thermokarst amplifies fluvial inorganic carbon cycling and export across watershed scales on the Peel Plateau, Canada
Source: Copernicus journal article supplement (doi:10.5194/bg-2020-111), 2020-04-15
Supplement: Supplementary file 1 [file bg-2020-111-supplement.zip]

## Sheet: META
	Biogeosciences
	Supporting Material for
	Thermokarst amplifies fluvial inorganic carbon cycling and export across watershed scales on the Peel Plateau, Canada
	Scott Zolkos1,†,*, Suzanne E. Tank1, Robert G. Striegl2, Steven V. Kokelj3, Justin Kokoszka3, Cristian Estop-Aragonés4,¥, David Olefeldt4
	1Department of Biological Sciences, University of Alberta, Edmonton, AB, T6G 2E3 Canada
	2USGS National Research Program, Boulder, CO, 80303 USA
	3Northwest Territories Geological Survey, Yellowknife, NT, X1A 2L9 Canada
	4Department of Renewable Resources, University of Alberta, Edmonton, AB, T6G 2E3 Canada
	†Present address: Woods Hole Research Center, Falmouth, MA 02540 USA
	¥Present address: Institute of Landscape Ecology, University of Münster, Münster, 48149 Germany
	*Correspondence to: Scott Zolkos
	Contact:	sgzolkos@gmail.com
	Citation
	Users of the data originating from this paper are requested to cite this paper. Please refer to original sources for data not originating
	from this paper (e.g. geospatial data).
	Background
	The worksheets in this file contain raw data and definitions of parameters. 'Parameters' worksheet includes the units and a brief
	description of each variable, where applicable. 'Data' worksheet includes raw data used in graphs and statistics; column names are
	formatted for R code.

## Sheet: Parameters
	Variable	Units	Description	Method (see main text for detailed methods and associated references)
	Date	mm/dd/yy	Sampling date	–
	Site	SB, DC, SC	Stream sampling site, where SB = RTS FM2; DC = Dempster Creek; SC = Stony Creek	–
	Loc	RU, IN, A, C	Sampling location, where 'RU' and 'IN' = RTS FM2 runoff; 'A' = upstream of tributary confluence; 'C' = tributary	–
	SiteLoc	–	Site+Loc	–
	Type	–	Site type: 'FM2in' = RTS FM2 runoff; 'Mainstem' = Dempster or Stony Creek mainstem; 'Trib' = tributary of DC or SC	–
	TimeYSI	hh:mm	Time of sampling, recorded from the YSI Multimeter	Digital chronometer
	Time	hh:mm	TimeYSI rounded to nearest hour and reported in 24 h time	–
	AirT	˚C	Air temperature at time of water sampling	Measured using handheld thermometer
	Temp	˚C	Water temperature, from YSI	YSI Professional Plus water quality meter; see Methods
	Atm	atm	Atmospheric pressure, from YSI	YSI Professional Plus water quality meter; see Methods
	DOpcnt	% saturation	Dissolved oxygen percent saturation, from YSI	YSI Professional Plus water quality meter; see Methods
	DOmgL	mg L-1	Dissolved oxygen concentration, from YSI	YSI Professional Plus water quality meter; see Methods
	Cond	µS cm-1	Specific conductivity, from YSI	YSI Professional Plus water quality meter; see Methods
	pH	pH units	From YSI	YSI Professional Plus water quality meter; see Methods
	CO2atm	ppm	Concentration of atmospheric CO2 at time of water sampling	PP Systems IRGA EGM-4 Infrared Gas Analyzer
	CO2H2O	ppm	Concentration of dissolved CO2 in stream water	PP Systems IRGA EGM-4 Infrared Gas Analyzer
	pCO2	µatm	Partial pressure of CO2 in stream water	See Methods
	CH4atm	ppm	Concentration of atmospheric CH4 at time of water sampling	Picarro isotope analyzer (G2201-i) equipped with SSIM
	CH4	ppm	Concentration of dissolved CH4 in stream water	Picarro isotope analyzer (G2201-i) equipped with SSIM
	CH4H2OuM	µM	Concentration of CH4 in stream water (CH4water)	See Methods
	pCH4	µatm	Partial pressure of CO4 in stream water	See Methods
	DICuM	µM	Concentration of stream water dissolved inorganic carbon (DIC)	From Apollo DIC Analyzer; See Methods
	CO2uM	µM	Concentration of CO2 dissolved in stream water (CO2water)	Calculated in CO2sys; See Methods
	HCO3uM	µM	Bicarbonate concentration in stream water	Calculated in CO2sys
	CO3uM	µM	Carbonate concentration in stream water	Calculated in CO2sys
	CauM	µM	Calcium concentration in stream water	Converted from measurement by Thermo ICAP-6300 (U. Alberta BASL)
	MguM	µM	Magnesium concentration in stream water	Converted from measurement by Thermo ICAP-6300 (U. Alberta BASL)
	NauM	µM	Sodium concentration in stream water	Converted from measurement by Thermo ICAP-6300 (U. Alberta BASL)
	KuM	µM	Potassium concentration in stream water	Converted from measurement by Thermo ICAP-6300 (U. Alberta BASL)
	FeuM	µM	Iron concentration in stream water	Converted from measurement by Thermo ICAP-6300 (U. Alberta BASL)
	SO4uM	µM	Sulfate concentration in stream water	Converted from measurement by Dionex DX-600 (U. Alberta BASL)
	CluM	µM	Chloride concentration in stream water	Converted from measurement by Dionex DX-600 (U. Alberta BASL)
	DOCuM	µM	Concentration of dissolved organic carbon in stream water	Converted from measurement by Shimadzu 5000A (made at U. Alberta BASL)
	SUVA254	L mgC-1 m-1	Spectral UV Absorbance at 254 nm	Absorbance by Ocean Optics UV-VIS equipped with Flame spectrometer module; See Methods
	DI13C	‰ VPDB	Stable DIC isotope concentration in stream water	Finnigan Mat DeltaPlusXP interfaced to OI Analytical Aurora Model 1030W (U. Ottawa G.G. Hatch Stable Isotope Laboratory)
	d13Cco2	‰ VPDB	Stable CO2 isotope concentration in stream water	Picarro isotope analyzer (G2201-i) equipped with SSIM (U. Alberta-Olefeldt lab)
	d13Cco2atm	‰ VPDB	Stable CO2 isotope concentration in the atmosphere	Picarro isotope analyzer (G2201-i) equipped with SSIM (U. Alberta-Olefeldt lab)
	TSS	mg L-1	Total suspended sediments	Modified version of U.S. Geological Survey Method I-3765
	Dist	m or km	Distance of sampling site along transect, where the upstream most site is at distance = 0	From GIS analyses
	Area	km2	Watershed area	From GIS analyses; See Methods
	MeanEVI	(-1 to 1)	Mean enhanced vegetation index within watershed	From GIS analyses; See Methods
	MeanTRI	m	Mean terrain roughness within watershed	From GIS analyses; See Methods
	nRTS	#	Number of RTSs within watershed	From GIS analyses; See Methods
	DistrbdAreaTot	m2	Total area of watershed disturbed by RTSs	From GIS analyses; See Methods
	DistrbdPcnt	%	Percent of watershed disturbed by RTSs	From GIS analyses; See Methods
	RainTot	mm	Total rainfall during sampling	From GNWT Meteorological Station
	RainTot12	mm	Total rainfall during 12 h prior to sampling	Calculated from GNWT Meteorological Station data; See Methods
	RainTot24	mm	Total rainfall during 24 h prior to sampling	Calculated from GNWT Meteorological Station data; See Methods
	RainTot48	mm	Total rainfall during 48 h prior to sampling	Calculated from GNWT Meteorological Station data; See Methods
	RainTot72	mm	Total rainfall during 72 h prior to sampling	Calculated from GNWT Meteorological Station data; See Methods
	RainTot96	mm	Total rainfall during 96 h prior to sampling	Calculated from GNWT Meteorological Station data; See Methods

## Sheet: Data
Date	Site	Loc	SiteLoc	SiteNo	Type	TimeYSI	Time	AirT	Temp	Atm	DOpcnt	DOmgL	Cond	pH	CO2atm	CO2H2O	pCO2	CH4atm	CH4H2O	CH4H2OuM	pCH4	DICuM	CO2uM	HCO3uM	CO3uM	CauM	MguM	NauM	KuM	FeuM	SO4uM	CluM	DOCuM	SUVA254	DI13C	d13Cco2	d13Cco2atm	TSS	Dist	Area	MeanEVI	MeanTRI	nRTS	DistrbdAreaTot	DistrbdPcnt	RainTot	RainTot12	RainTot24	RainTot48
2017-07-31	SB	RU1	NA	1	FM2in	13:36:00	14:00:00	22.3	17.9	0.9715	95.3	9.02	1370	7.72	396	1038	1046.41	1.91	2.7	0.01	3.86	1559.1	43.453	1510.41	5.234	7136.08	3296.03	1587.66	169.573	0.179067	10104.8	27.0781	757.658	1.85	NA	-12.104	-9.71	NA	NA	NA	NA	NA	NA	NA	NA	0	0.1	0.1	0.1
2017-07-31	SB	RU2	NA	2	FM2in	13:05:00	13:00:00	20.6	20.1	0.9722	92.2	8.29	1816	7.51	394	1507	1534.35	1.91	1.64	0	1.18	1502	59.711	1438.78	3.512	NA	NA	NA	NA	NA	NA	NA	NA	NA	NA	-11.432	-9.71	NA	NA	NA	NA	NA	NA	NA	NA	0	0.1	0.1	0.1
2017-07-31	SB	RU3	NA	3	FM2in	12:35:00	13:00:00	20.7	18.6	0.9733	95.1	8.83	1920	7.71	402	908	914.22	1.91	1.71	0	1.38	1462.1	37.178	1419.49	5.43	NA	NA	NA	NA	NA	NA	NA	NA	NA	NA	-10.305	-9.71	NA	NA	NA	NA	NA	NA	NA	NA	0	0.1	0.1	0.1
2017-07-31	SB	RU4	NA	4	FM2in	12:19:00	12:00:00	19.9	16.9	0.9742	96.3	9.27	1903	7.73	405	873	877.5	1.91	3.57	0.01	5.98	1433.3	37.558	1390.64	5.097	NA	NA	NA	NA	NA	NA	NA	NA	NA	NA	-9.986	-9.71	NA	NA	NA	NA	NA	NA	NA	NA	0	0.1	0.1	0.1
2017-07-31	SB	RU5	NA	5	FM2in	12:07:00	12:00:00	19.9	15.9	0.975	98.3	9.66	1986	7.8	396	741	742	1.91	3.06	0.01	4.71	1424.4	32.75	1385.89	5.764	NA	NA	NA	NA	NA	NA	NA	NA	NA	NA	-11.227	-9.71	NA	NA	NA	NA	NA	NA	NA	NA	0	0.1	0.1	0.1
2017-07-30	SB	IN	NA	5	FM2in	13:29:00	13:00:00	20.8	17.2	0.9696	98.2	9.4	1653	7.82	408	695	690.64	1.88	3.03	0.01	4.69	1486.5	29.292	1450.09	7.121	7311.99	3189.47	1669.87	167.782	0.179067	10856.5	25.3857	726.019	1.84	-0.99	-11.552	-9.16	15805	3.23	NA	NA	NA	NA	NA	NA	0	0	0	0
2017-07-31	DC	1A	DC1A	1	Mainstem	16:08:00	16:00:00	20.7	11.9	0.9593	92.1	9.94	52.2	5.82	403	2466	2467.08	1.91	215.4	0.91	490.99	238.8	123.76	115.03	0.01	98.0588	92.985	63.0714	4.34802	25.6066	108.474	5.64127	959.977	3.66	-14.98	-21.587	-9.71	5	0	2.01297	0.478986	0.719366	0	0	0	0	0.1	0.1	0.1
2017-07-29	DC	2A	DC2A	2	Mainstem	13:25:00	13:00:00	22	11.6	0.9749	101.1	10.97	958	7.55	426	690	686.42	1.81	3.53	0.01	5.84	1360.6	34.778	1321.03	4.789	2521.58	1605.84	3059.18	77.7527	0.179067	4795.02	38.9248	790.129	2.53	-4.17	-16.048	-9.58	11795	5.55	16.3714	0.457951	3.40208	3	520904	3.18178	0	0	0	0
2017-07-27	DC	3A	DC3A	3	Mainstem	17:06:00	17:00:00	16.5	13.9	0.9866	101.8	10.49	655	7.54	400	651	655.85	1.82	2.87	0.01	4.35	1107.4	30.83	1072.95	3.619	1679.72	14844.7	1693.36	56.78	0.179067	2548.2	39.2068	823.432	2.93	-5.29	-15.578	-9.16	9165	8.88	23.9173	0.440426	4.01456	3	520904	2.17793	0	0	0	0.5
2017-07-27	DC	4C	DC4C	4	Mainstem	15:25:00	15:00:00	18.8	12.3	0.9945	103.5	11.06	415.5	7.35	406	593	599.79	1.85	4.57	0.02	8.39	978.4	29.695	945.817	2.888	1128.3	10672.7	896.485	37.5975	2.68601	1512.39	50.2073	1156.47	3.28	-5.74	-18.492	-8.97	2796.7	13.45	57.3238	0.419877	3.81136	5	684040	1.19329	0	0	0	1.1
2017-07-29	DC	2C	DC2C	2	Trib	13:55:00	14:00:00	23.8	6.6	0.9749	102.1	12.5	389.6	7.56	415	838	835.81	1.81	2.19	0.01	2.72	1285.7	50.32	1232.59	2.791	789.211	3180.42	1421.93	35.2957	4.29761	1208.83	21.4368	1053.23	3.46	-10.49	-21.336	-9.58	25.9	5.55	2.22366	0.378691	2.6859	0	0	0	0	0	0	0
2017-07-27	DC	3C	DC3C	3	Trib	17:00:00	17:00:00	18	12.6	0.9866	102.5	10.91	171.4	7.32	409	480	477.6	1.82	3.23	0.01	5.19	585.7	23.414	560.995	1.291	539.448	3468.42	252.286	23.2747	8.77429	450.656	35.54	1241.39	3.65	-7.23	-18.093	-9.16	984.5	8.88	10.9244	0.409219	2.09252	1	160656	1.47062	0	0	0	0.5
2017-07-27	DC	4A	DC4A	4	Trib	15:39:00	16:00:00	18	12.6	0.9944	103.1	10.96	236.4	7.3	403	547	551.77	1.85	2.75	0.01	4.04	725.9	27.05	697.124	1.726	662.708	3089.9	329.711	19.9497	5.90921	713.304	18.6162	921.678	3.61	-8.02	-16.778	-8.97	222.5	13.45	168.387	0.459171	3.50246	9	673405	0.399915	0	0	0	0.6
2017-07-27	SC	1A	SC1A	1	Mainstem	12:10:00	12:00:00	16.5	6.7	0.9374	100.1	12.22	406.1	5.66	416	572	543.11	1.79	1.84	0	1.85	65.1	32.581	32.516	0.003	841.858	1148.32	147.022	18.9267	0.179067	13368.4	0.564127	101.576	1.29	-11.6	-13.8	-9.02	2.5	0	82.6925	0.32482	13.6292	0	0	0	0	0	0	2.4
2017-07-27	SC	2A	SC2A	2	Mainstem	13:43:00	14:00:00	19.5	8.2	0.9484	99.9	11.74	395.8	6.37	405	469	448.24	1.82	1.88	0	1.94	94.2	25.499	68.683	0.017	934.428	982.102	147.457	22.7631	0.179067	1759.21	8.46191	124.056	1.58	-8.01	-15.084	-10	920	6.63	136.439	0.337738	13.177	1	36788	0.0269629	0	0	0	2.3
2017-07-25	SC	3A	SC3A	3	Mainstem	17:56:00	18:00:00	11.3	7.9	0.9579	100	11.86	334.1	7.01	402	490	473.38	1.77	3.51	0.01	5.51	138.9	27.214	111.643	0.043	772.244	795.31	143.542	20.4612	0.179067	1490.73	9.59016	202.32	2.16	-6.91	-15.256	-9.16	799.1	13.79	175.92	0.367579	11.2456	18	500280	0.284379	0	2.3	2.7	20.7
2017-07-25	SC	4A	SC4A	4	Mainstem	12:15:00	12:00:00	12.8	8.2	0.9729	102.9	12.12	283.3	6.69	406	454	444.11	1.83	3.62	0.01	5.79	273.2	25.265	247.709	0.227	662.957	611.808	190.519	20.2055	0.358134	1170	14.9494	306.393	2.77	-8.89	-17.635	-10.07	461.8	30.01	478.791	0.422285	7.27752	73	1.90727e+06	0.398351	0	0.6	0.6	18.6
2017-07-25	SC	5A	SC5A	5	Mainstem	13:33:00	14:00:00	11.3	8.7	0.9788	102.1	11.87	278.5	7.2	402	488	481.71	1.88	2.38	0.01	2.99	352.7	26.93	325.402	0.368	696.392	545.567	199.654	20.2055	0.716268	1093.48	10.7184	363.842	3.09	-8.37	-17.59	-9.07	506.6	35.71	489.976	0.422256	7.26404	73	1.90727e+06	0.389258	1.2	0.6	0.7	18.7
2017-07-25	SC	6A	SC6A	6	Mainstem	14:40:00	15:00:00	13.7	9.4	0.9865	102.9	11.75	290.1	7.33	399	464	461.04	1.84	2.36	0.01	3.04	407.8	25.159	382.095	0.546	737.811	564.904	235.322	22.2516	0.716268	997.397	10.7184	385.49	3.01	-7.84	-18.075	-9.38	665.4	45.27	626.018	0.429482	6.71846	86	2.29818e+06	0.36711	0.5	1.8	1.9	19.9
2017-07-25	SC	7A	SC7A	7	Mainstem	15:31:00	16:00:00	11.5	9.9	0.995	102.3	11.57	292.8	7.3	405	461	461.48	1.82	2.52	0.01	3.45	434.8	24.756	409.405	0.639	757.772	559.144	237.062	22.7631	0.537201	1131.17	4.79508	389.653	2.99	-8.06	-18.083	-10.01	760.5	56.2	689.19	0.432009	6.52577	95	2.41989e+06	0.351121	0.1	2.3	2.4	20.4
2017-07-25	SC	8A	SC8A	8	Mainstem	16:45:00	17:00:00	13.3	10.6	1.0019	102.5	11.43	278.5	7.3	403	512	518.51	1.78	7.46	0.03	15.18	488.7	27.164	460.795	0.741	736.564	496.194	267.075	23.2747	1.25347	1046.01	12.9749	551.175	3.19	-7.76	-18.073	-9.6	1072.6	69.7	995.022	0.437298	5.57666	109	3.77734e+06	0.379624	0.2	2.2	2.5	20.5
2017-07-27	SC	1C	SC1C	1	Trib	11:55:00	12:00:00	16.6	6.8	0.9378	98.5	12	523.7	5	418	478	451.29	1.79	1.84	0	1.85	25.8	25.003	0.797	0	1449.42	1189.06	80.9054	19.9497	1.25347	2637	0.564127	100.744	0.73	-15.6	-12.302	-9.02	4.8	0	25.6099	0.284927	16.1569	0	0	0	0	0	0	2.4
2017-07-27	SC	2C	SC2C	2	Trib	13:26:00	13:00:00	19.5	8.3	0.9482	100.2	11.77	226.3	6.71	411	523	501.44	1.82	1.94	0	2.07	478	28.426	448.911	0.662	612.056	357.54	296.653	41.6898	0.179067	784.197	47.3867	437.11	2.22	-4.97	-15.887	-10	39568	6.63	6.78982	0.482535	3.4213	6	237314	3.49514	0	0	0	2.4
2017-07-25	SC	3C	SC3C	3	Trib	17:45:00	18:00:00	13.2	7.5	0.958	103.2	12.36	147.8	7.11	408	465	448.25	1.77	1.9	0	2.02	364.7	26.136	338.158	0.407	385.748	224.234	154.416	14.0671	1.25347	458.359	0.564127	457.925	3.12	-9.28	-18.028	-9.16	10.3	13.79	59.293	0.449547	6.68985	3	96277.3	0.162375	0	2.3	2.7	20.7
2017-07-25	SC	4C	SC4C	4	Trib	11:59:00	12:00:00	12.8	8.9	0.9729	104.5	12.04	244.5	6.53	413	580	572.09	1.83	2.46	0.01	3.22	407	31.762	374.823	0.415	684.415	398.683	199.654	19.9497	1.43254	879.346	5.64127	550.343	3.31	-8.45	-19.372	-10.07	703.8	30.01	193.656	0.453719	4.51224	50	1.30371e+06	0.673206	0	0.6	0.6	18.6
2017-07-25	SC	5C	SC5C	5	Trib	12:44:00	13:00:00	13.8	10.3	0.9781	101.4	11.33	478.5	7	467	503	493.96	1.88	2.08	0	2.33	628.4	26.141	600.952	1.307	1132.29	943.016	766.427	35.2957	0.895335	1949.3	8.74397	596.135	2.88	-6.99	-18.034	-9.07	1269.5	35.71	103.969	0.461866	4.72341	11	325788	0.313351	0.1	0.5	0.6	18.6
2017-07-25	SC	6C	SC6C	6	Trib	14:33:00	15:00:00	12.5	9.8	0.9863	103	11.68	260	7.37	402	500	497.95	1.84	5.04	0.02	9.18	661.1	26.804	632.887	1.409	728.33	359.597	546.764	26.0881	3.40227	831.251	14.6673	1142.31	3.34	-8.01	-18.315	-9.38	1936.4	45.27	38.4709	0.470962	2.71462	8	76480.7	0.198801	0.5	1.8	1.9	19.9
2017-07-25	SC	7C	SC7C	7	Trib	15:22:00	15:00:00	11.9	9.6	0.995	103.8	11.82	230.2	7.32	404	474	475.1	1.82	2.86	0.01	4.23	597.1	25.749	570.161	1.189	647.238	332.442	344.501	22.5074	4.11854	734.957	13.8211	1078.21	3.56	-10.73	-18.021	-10.01	1257.8	56.2	226.814	0.449072	3.64811	14	1.35744e+06	0.598484	0.5	1.8	1.9	19.9
[truncated: 2 more columns]
